# Supplementary material for: CD45-Directed CAR-T Cells with CD45 Knockout Efficiently Kill Myeloid Leukemia and Lymphoma Cells In Vitro Even after Extended Culture
Source: MDPI journal article supplement (doi:10.3390/cancers16020334), 2024-01-12
Supplement: s1 [file s1]

Supplementary Figures & Table

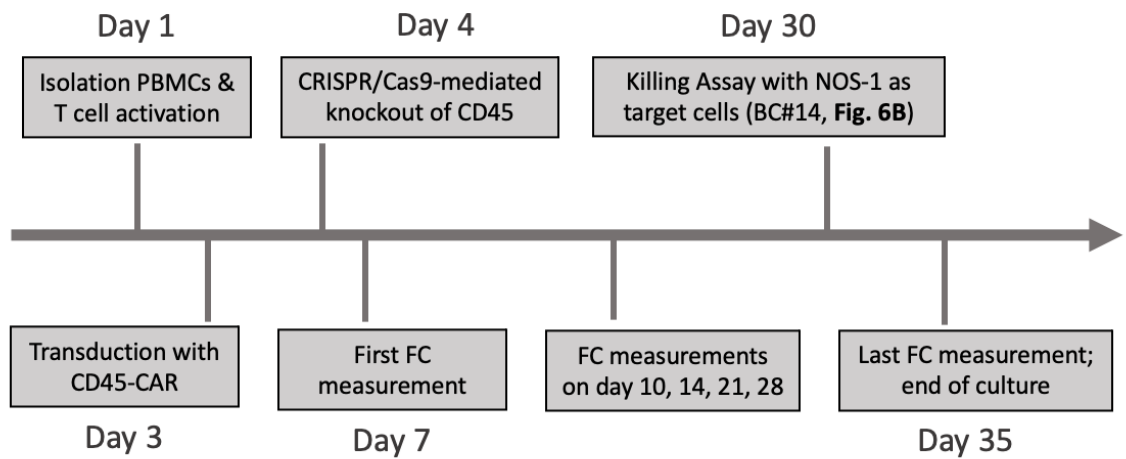

**Suppl. Figure S1:** Timeline of the experiment with BC#13-#15, CD45<sup>ko</sup>/CD45CAR-T cells produced following protocol P1.

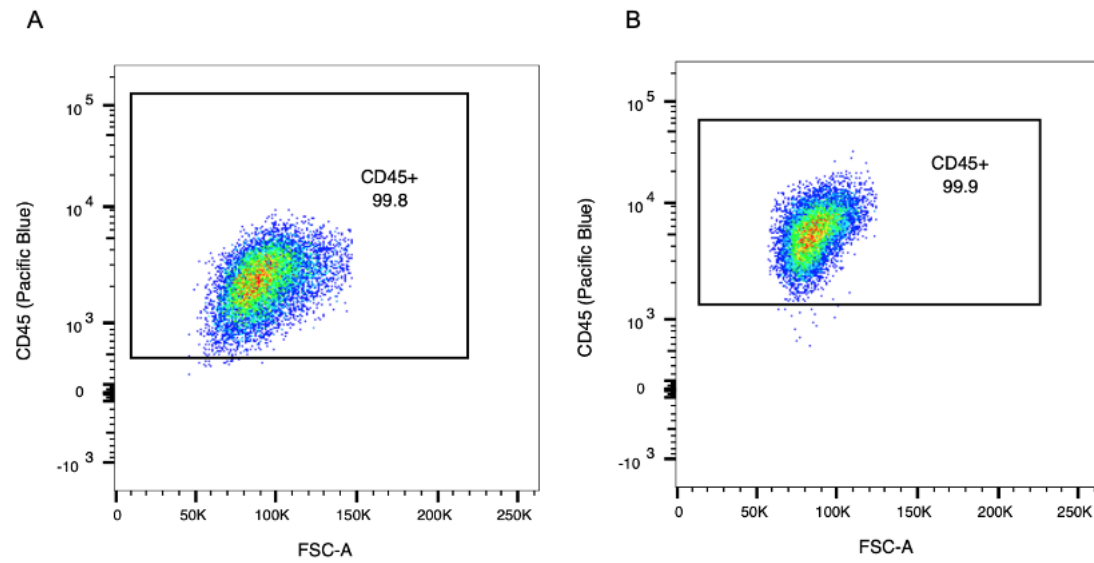

**Suppl. Figure S2:** Homogenous CD45 expression in (A) Ramos-GFP+ and (B) NOS-1-GFP+ cells. Cells were stained with VioBlue-labelled CD45 antibodies and analyzed by FC.

**Suppl. Table S1:** Comparison of cell outcomes at day 12 of protocols 1 & 2 for BC#6 (small-scale)

|                             | Cell No [ $\times 10^6$ ] | CAR <sup>+</sup> [%] | CD45 <sup>ko</sup> [%] | CD45 <sup>ko</sup> /CD45-CAR [ $\times 10^6$ ] |
|-----------------------------|---------------------------|----------------------|------------------------|------------------------------------------------|
| P1: Transduction → knockout | 1.3                       | 15.6                 | 96.8                   | 0.20                                           |
| P2: Knockout → transduction | 0.95                      | 33.2                 | 66.0                   | 0.21                                           |
